# Supplementary material
Source: publisher figshare collection journal article supplement (https://diabetesjournals.figshare.com/articles/dataset/_/12279131)

## Supplementary Figures

Figure S1 Plot of SNP-outcome associations against SNP-exposure associations for MR analysis (by GSMR) on type 2 diabetes (Mahajan et al. 2018)

(a)  $r^2$  clumping threshold=0.001; (b)  $r^2$  clumping threshold=0.1; (c)  $r^2$  clumping threshold=0.2

(a)  $r^2$  clumping threshold=0.001

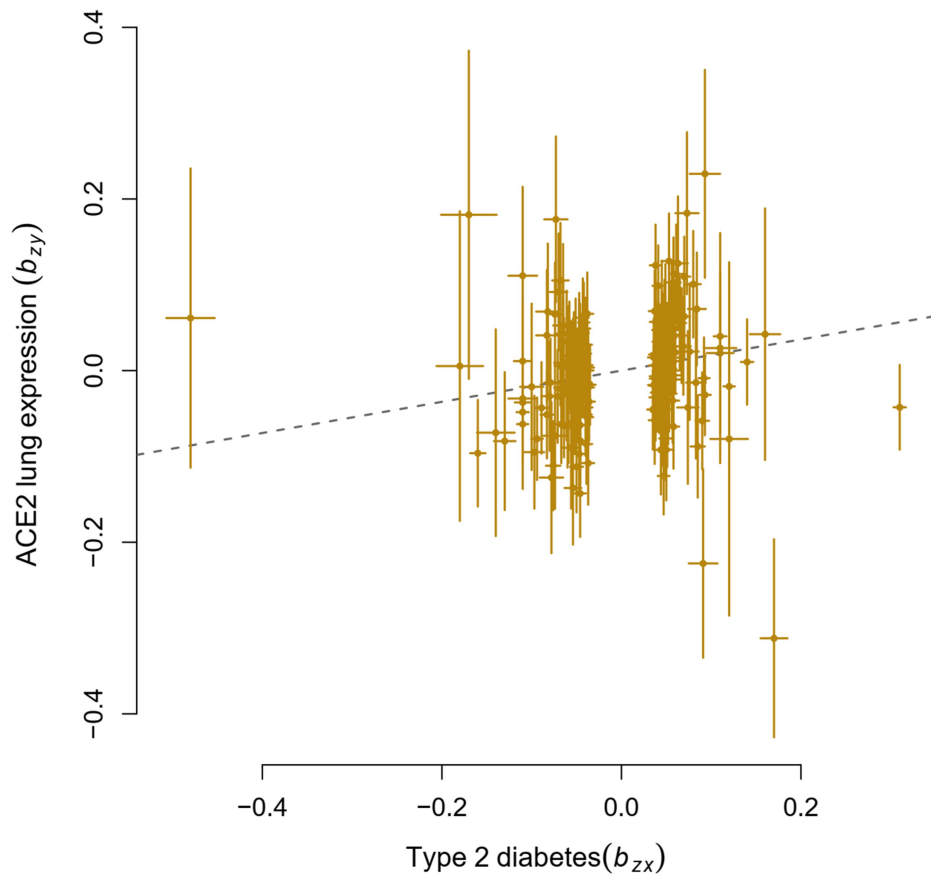

**(b)  $r^2$  clumping threshold=0.1**

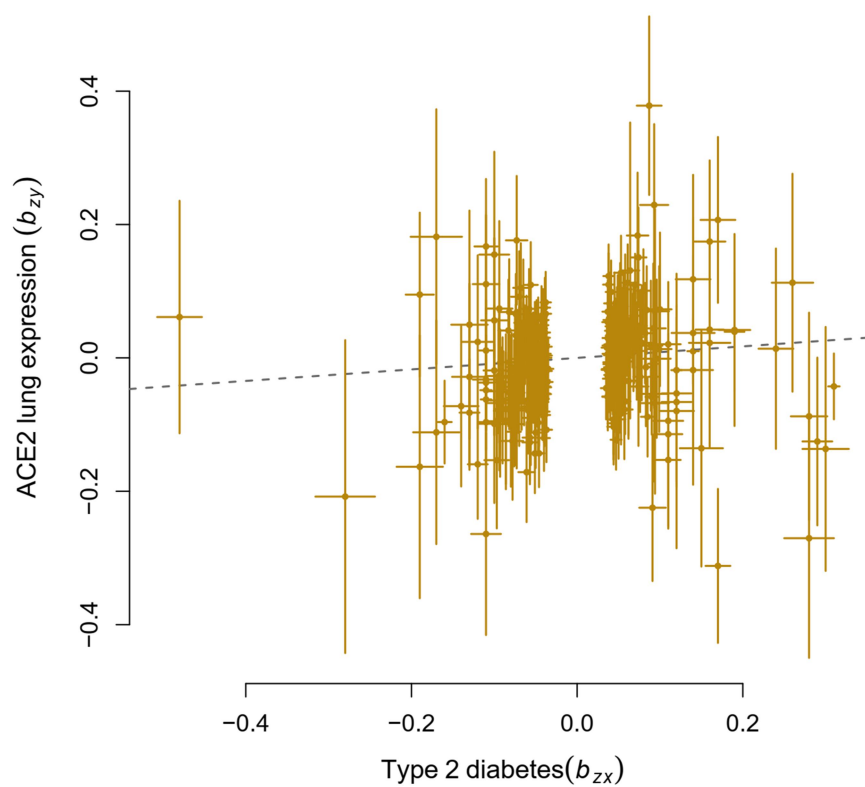

**(c)  $r^2$  clumping threshold=0.2**

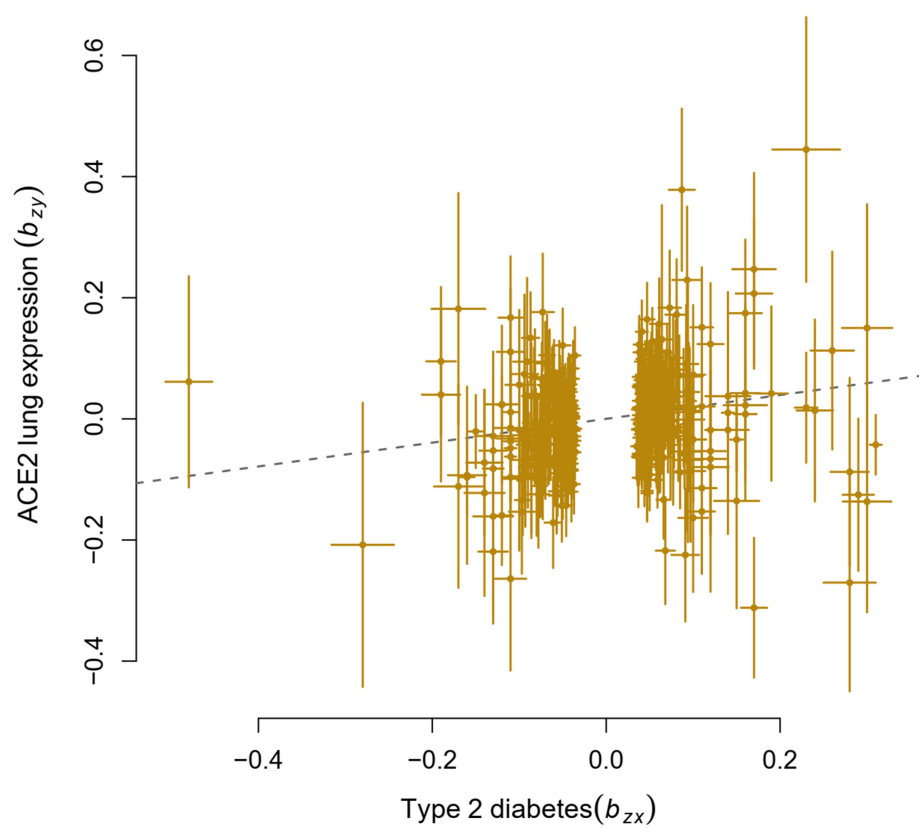

Figure S2 Leave-one-out sensitivity plot for MR analysis on type 2 Diabetes (Mahajan et al. 2018)

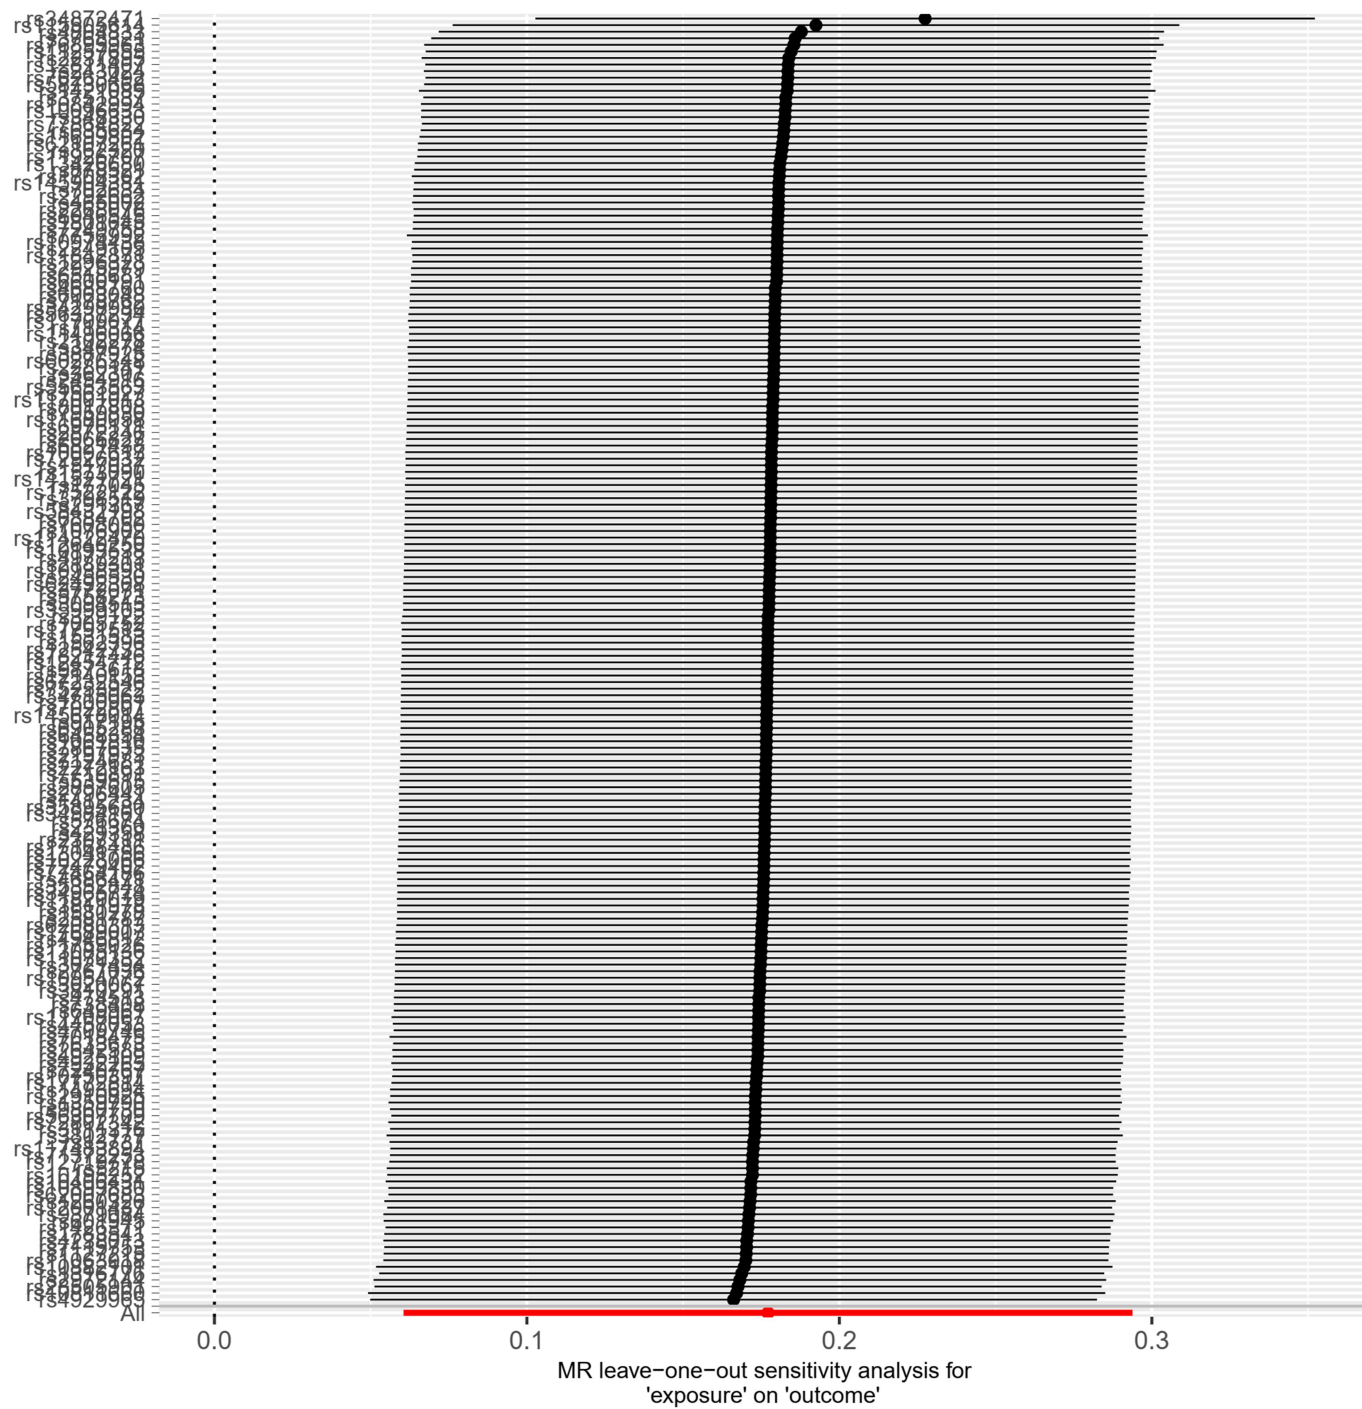

Supplement: Supplementary file 1 [file 1]
